# Supplementary material for: Regulation of cerebrospinal fluid production by caffeine consumption
Source: PubMed Central journal article supplement (PMC2744679; doi:10.1186/1471-2202-10-110), 2009-09-03

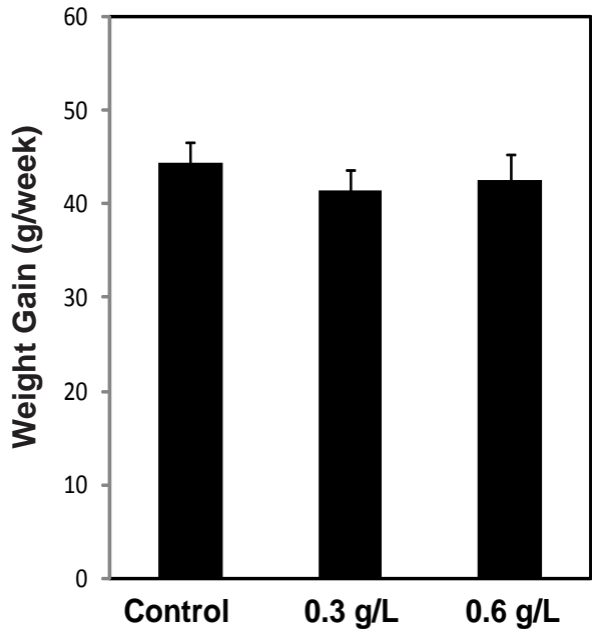

Supplement: 1471-2202-10-110-S2.pdf [file 1471-2202-10-110-S2.pdf]
